# Supplementary material
Source: ML conference proceedings conference paper supplement (https://openreview.net/forum?id=QK4oDiuCXS)
Supplement: supplementary_material [file attachment]

# Pseudo-HFOs Elimination in iEEG Recordings Using a Robust Residual-based Dictionary Learning Framework

Behrang Fazli Besheli, Zhiyi Sha, Amir Hossein Ayyoubi, Chandra Prakash Swamy, Tom Henry, Gregory A. Worrell, Kai J. Miller, and Nuri Firat Ince

## Supplementary Materials:

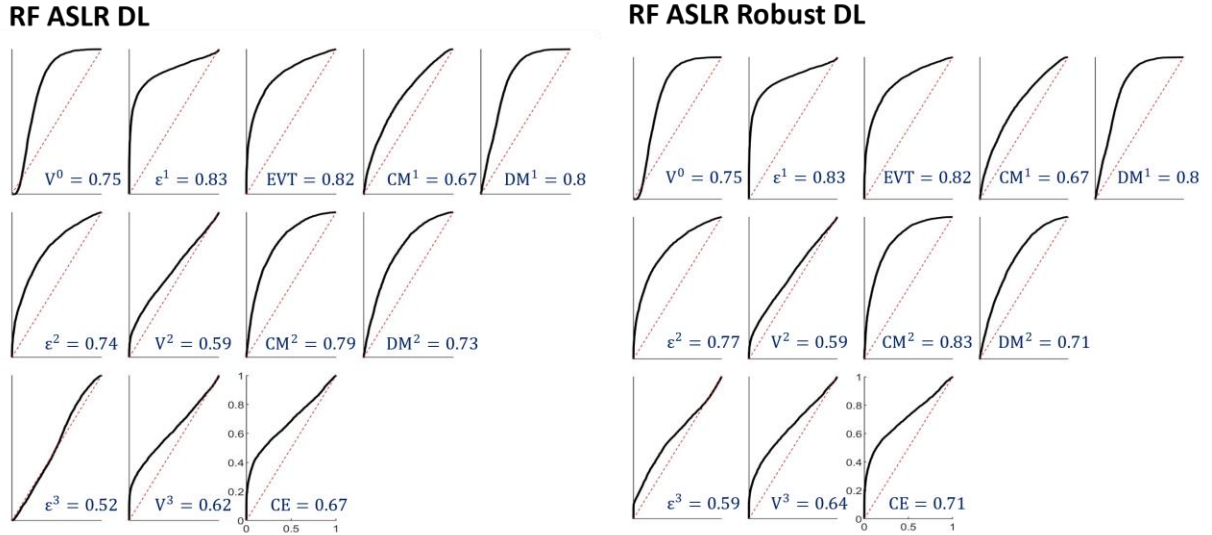

Fig. S1. ROC curves of all features: The left panel displays the ROC curves of features extracted based on OMP representation, while the right panel presents the ROC curves of features extracted using robust Huber regression. The AUC value for each corresponding feature is shown next to each subplot.

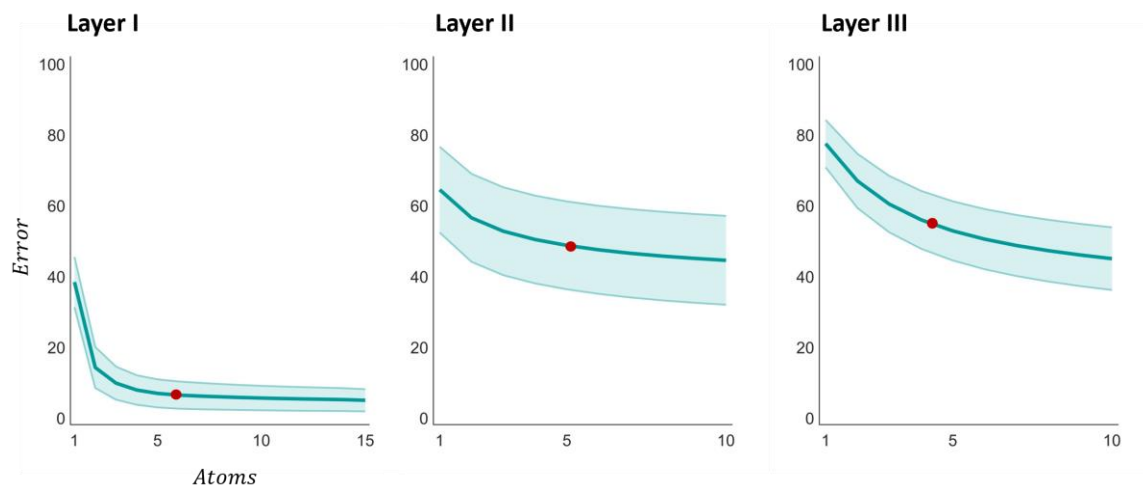

Fig. S2. For each layer of representation, the shaded plot shows the approximation error versus sparsity level within the local representation, indicating the number of atoms used to represent each segment during the ASLR. We used 6, 5, and 4 atoms for each layer, respectively. These values were chosen based on the balance between sparsity level and low approximation error observed in the shaded plots. This scheme ensures that the chosen sparsity levels accurately represent the majority of signals in real-HFOs.

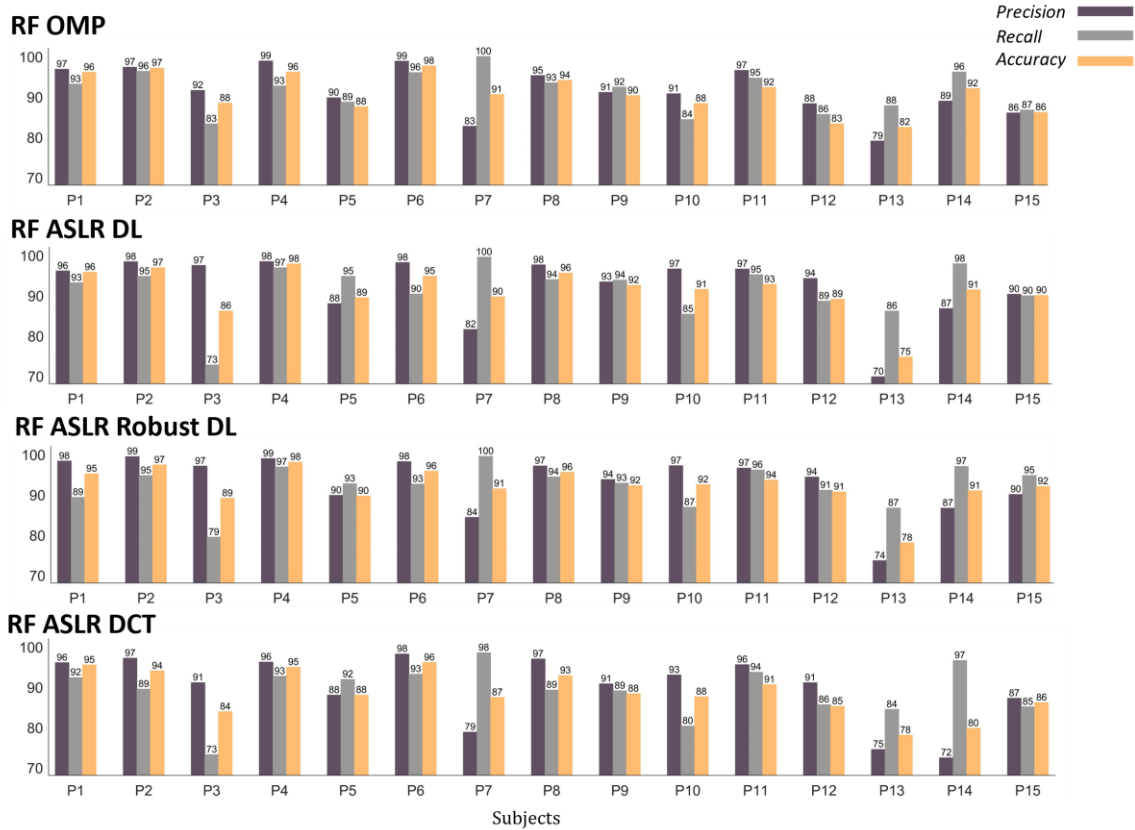

Fig. S3. Detailed analysis of classification results for different methods, presented in terms of precision, recall, and accuracy for each subject.

**Table S1. Computational time\***

| Method                   |                            | Average Processing Time (ms per Event) |
|--------------------------|----------------------------|----------------------------------------|
| <b>RF-OMP</b>            | Step 0. Initial detection  | 9 ms/Event                             |
|                          | Step 1. Feature extraction | 37 ms/Event                            |
|                          | Step 2. Prediction         | <1 ms/Event                            |
|                          | <b>Total</b>               | <b>~46 ms/Event</b>                    |
| <b>RF ASLR DL</b>        | Step 0. Initial detection  | 9 ms/Event                             |
|                          | Step 1. Feature extraction | 108 ms/Event                           |
|                          | Step 2. Prediction         | <1 ms/Event                            |
|                          | <b>Total</b>               | <b>~117 ms/Event</b>                   |
| <b>RF ASLR DL Robust</b> | Step 0. Initial detection  | 9 ms/Event                             |
|                          | Step 1. Feature extraction | 1741 ms/Event                          |
|                          | Step 2. Prediction         | <1 ms/Event                            |
|                          | <b>Total</b>               | <b>~1750 ms/Event</b>                  |
| <b>RF ASLR DCT</b>       | Step 0. Initial detection  | 9 ms/Event                             |
|                          | Step 1. Feature extraction | 94 ms/Event                            |
|                          | Step 2. Prediction         | <1 ms/Event                            |
|                          | <b>Total</b>               | <b>~103 ms/Event</b>                   |

\* **Hardware:** Intel(R) Xeon(R) w9-3475X 2.21 GHz, 512 GB installed RAM, **Environment:** MATLAB 2022b, MATHWORKS, Natick/USA
